# Supplementary material
Source: bioRxiv or medRxiv preprint supplement (https://www.biorxiv.org/highwire/filestream/10968/field_highwire_adjunct_files/3/040386-4.pdf)

# A. africanus Ensemble Model under Current Climate Conditions

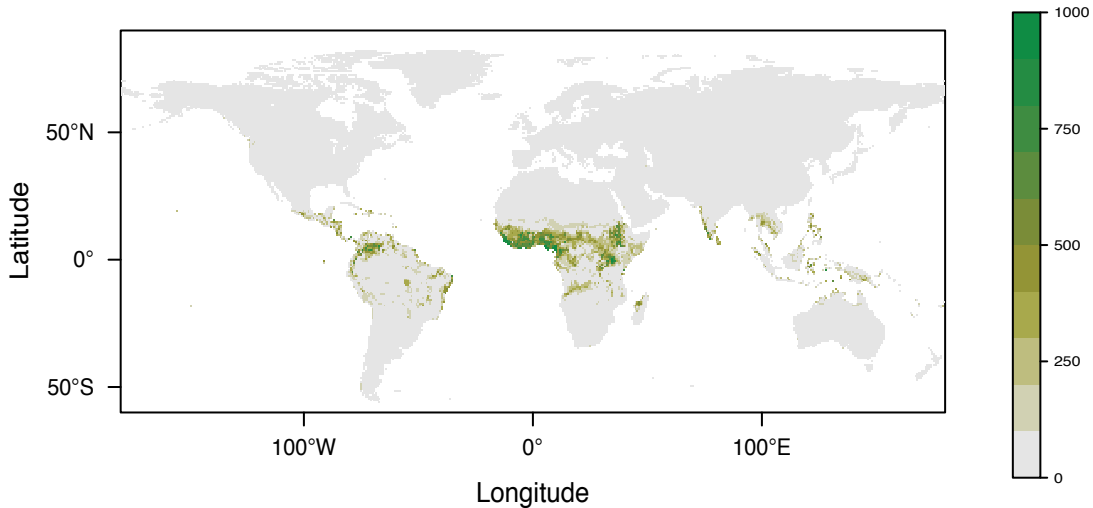

Supplement: Supplementary file [file 040386-4.pdf]
